# Supplementary material for: Underground salt and potash workers exposed to nitrogen oxides and diesel exhaust: assessment of specific effect biomarkers
Source: PubMed Central journal article supplement (PMC9630174; doi:10.1007/s00420-022-01876-2), 2022-05-18
Supplement: 420_2022_1876_MOESM1_ESM.pdf [file 420_2022_1876_MOESM1_ESM.pdf]

## Supplementary Information (SI)

International Archives of Occupational and Environmental Health

# Underground Salt and Potash Workers exposed to Nitrogen Oxides and Diesel Exhaust – Assessment of specific Effect Biomarkers

Lisa Gamrad-Streubel<sup>1</sup> (<https://orcid.org/0000-0001-9694-5057>) – Lisa-Marie Haase<sup>1</sup> – Katharina K. Rudolph<sup>1</sup> – Katrin Rühle<sup>1</sup> – Annette M. Bachand<sup>2</sup> (<https://orcid.org/0000-0002-5265-1572>) – Lori Crawford<sup>2</sup> (<https://orcid.org/0000-0003-0972-4104>) – Kenneth A. Mundt<sup>3</sup> (<https://orcid.org/0000-0002-9700-8679>) – Jürgen Büniger<sup>4</sup> (<https://orcid.org/0000-0001-6831-7854>) – Dirk Pallapies<sup>4</sup> – Dirk Taeger<sup>4</sup> (<https://orcid.org/0000-0002-5340-5584>) – Swaantje Casjens<sup>4</sup> (<https://orcid.org/0000-0002-0148-8859>) – Anja Molkenthin<sup>4</sup> – Savo Neumann<sup>4</sup> – Jörg Giesen<sup>5</sup> – Volker Neumann<sup>5</sup> – Thomas Brüning<sup>4</sup> – Thomas Birk<sup>1</sup> (<https://orcid.org/0000-0003-3882-7743>)

<sup>1</sup> Ramboll Deutschland GmbH, Environment & Health, Essen, Germany

<sup>2</sup> Ramboll US Consulting, Inc., Amherst, Massachusetts, USA

<sup>3</sup> Cardno ChemRisk, Boston, Massachusetts, USA

<sup>4</sup> Institute for Prevention and Occupational Medicine of the German Social Accident Insurance, Institute of the Ruhr University Bochum (IPA), Bochum, Germany

<sup>5</sup> Institute for the Research on Hazardous Substances (IGF), Bochum, Germany

### Corresponding Author

Lisa Gamrad-Streubel  
Ramboll Deutschland GmbH  
City Tower - Limbecker Platz 1  
45127 Essen  
Germany  
[lgamrad@ramboll.com](mailto:lgamrad@ramboll.com)

**Table S1** Duration of employment and age of non-participants

| Parameter    | Duration of employment of non-participants [Years] | Age of non-participants [Years] |
|--------------|----------------------------------------------------|---------------------------------|
| N            | 1456                                               | 1456                            |
| Median (IQR) | 14.6 (24.2)                                        | 43.7 (21.4)                     |

**Table S2** Number N, median (IQR) and mean (SD) pre- and post-shift measurements of FEV<sub>1</sub>% and FVC%, by smoking status and exposure group

| Group of biomarkers    | Biomarkers                               | Above-ground facility |              |             | Underground |              |             |        |              |             |
|------------------------|------------------------------------------|-----------------------|--------------|-------------|-------------|--------------|-------------|--------|--------------|-------------|
|                        |                                          | Reference             |              |             | Maintenance |              |             | Mining |              |             |
|                        |                                          | N                     | Median (IQR) | Mean (SD)   | N           | Median (IQR) | Mean (SD)   | N      | Median (IQR) | Mean (SD)   |
| Respiratory biomarkers | <b>FEV<sub>1</sub>% [%] (pre shift)</b>  |                       |              |             |             |              |             |        |              |             |
|                        | Non-smoker                               | 106                   | 94.0 (17.0)  | 94.9 (12.2) | 96          | 99.5 (17.5)  | 97.2 (12.8) | 316    | 96.0 (14.5)  | 95.0 (11.3) |
|                        | Former smoker                            | 62                    | 99.0 (18.0)  | 98.0 (14.4) | 41          | 93.0 (16.0)  | 90.8 (11.7) | 161    | 93.0 (15.0)  | 93.3 (11.0) |
|                        | Current smoker                           | 68                    | 91.0 (11.0)  | 90.8 (11.9) | 46          | 94.0 (11.0)  | 93.1 (10.7) | 239    | 92.0 (13.0)  | 92.3 (10.6) |
|                        | <b>FEV<sub>1</sub>% [%] (post shift)</b> |                       |              |             |             |              |             |        |              |             |
|                        | Non-smoker                               | 106                   | 92.0 (19.0)  | 94.3 (12.1) | 96          | 99.0 (15.5)  | 97.4 (13.1) | 316    | 95.5 (15.0)  | 94.9 (11.7) |
|                        | Former smoker                            | 62                    | 98.4 (18.0)  | 98.1 (14.3) | 41          | 91.0 (16.0)  | 90.7 (11.1) | 161    | 94.0 (16.0)  | 94.1 (11.0) |
|                        | Current smoker                           | 68                    | 90.0 (13.0)  | 90.1 (11.0) | 46          | 94.5 (12.0)  | 94.4 (10.0) | 239    | 93.0 (14.0)  | 92.3 (10.4) |
|                        | <b>FVC% [%] (pre shift)</b>              |                       |              |             |             |              |             |        |              |             |
|                        | Non-smoker                               | 106                   | 96.0 (17.0)  | 96.7 (11.9) | 96          | 100.0 (14.0) | 99.3 (10.7) | 316    | 98.0 (14.0)  | 98.1 (10.3) |
|                        | Former smoker                            | 62                    | 98.5 (14.0)  | 99.9 (11.8) | 41          | 96.0 (13.0)  | 94.4 (10.0) | 161    | 98.0 (13.0)  | 97.5 (10.3) |
|                        | Current smoker                           | 68                    | 96.0 (9.5)   | 95.9 (9.1)  | 46          | 96.0 (17.0)  | 99.2 (11.4) | 239    | 98.0 (13.0)  | 97.2 (9.6)  |
|                        | <b>FVC% [%] (post shift)</b>             |                       |              |             |             |              |             |        |              |             |
|                        | Non-smoker                               | 106                   | 95.5 (17.0)  | 96.4 (11.9) | 96          | 100.0 (14.0) | 99.0 (11.1) | 316    | 98.0 (14.0)  | 97.9 (10.4) |
|                        | Former smoker                            | 62                    | 99.0 (14.0)  | 99.4 (11.4) | 41          | 95.0 (10.0)  | 94.4 (10.0) | 161    | 97.0 (15.0)  | 97.9 (9.9)  |
|                        | Current smoker                           | 68                    | 95.0 (9.0)   | 94.9 (9.1)  | 46          | 100.5 (18.0) | 99.9 (11.3) | 239    | 97.0 (14.0)  | 97.0 (9.5)  |

**Table S3** Number N and mean (SD), pre shift, post shift and post- vs. pre-shift differences in cardiovascular biomarkers and biomarkers of inflammation and immune response, by exposure group; and number N and mean (SD), pre shift, post shift and post- vs. pre-shift differences of FeNO as well as pre- and post-shift measurements of FEV<sub>1</sub>%/FVC%, by smoking status and exposure group

| Group of biomarkers                            | Biomarkers                                       | Above-ground facility |               |               |                    | Underground |               |               |                    |            |               |               |                    |
|------------------------------------------------|--------------------------------------------------|-----------------------|---------------|---------------|--------------------|-------------|---------------|---------------|--------------------|------------|---------------|---------------|--------------------|
|                                                |                                                  | Reference             |               |               |                    | Maintenance |               |               |                    | Mining     |               |               |                    |
|                                                |                                                  | N*                    | Mean (SD)     |               |                    | N*          | Mean (SD)     |               |                    | N*         | Mean (SD)     |               |                    |
|                                                |                                                  |                       | Pre shift     | Post shift    | post-vs. pre-shift |             | Pre shift     | Post shift    | post-vs. pre-shift |            | Pre shift     | Post shift    | post-vs. pre-shift |
| Cardiovascular biomarkers                      | PTT [s]                                          | 229                   | 33.3 (5.7)    | 32.6 (4.2)    | -0.8 (5.5)         | 193         | 32.6 (4.7)    | 32.8 (4.1)    | 0.1 (3.9)          | 765        | 32.7 (4.2)    | 32.6 (4.2)    | -0.1 (2.9)         |
|                                                | Thrombocytes [1/ni]                              | 231                   | 236.2 (49.8)  | 242.0 (52.1)  | 7.0 (19.9)         | 187         | 235.8 (54.6)  | 244.0 (52.0)  | 7.3 (22.7)         | 770        | 236.7 (48.2)  | 241.8 (48.2)  | 5.2 (20.8)         |
|                                                | SBP [mmHg]                                       | 243                   | 125.8 (12.8)  | 127.4 (12.1)  | 1.6 (12.0)         | 202         | 126.3 (12.0)  | 127.8 (13.0)  | 1.4 (12.2)         | 799        | 128.3 (12.8)  | 129.1 (11.6)  | 0.8 (13.1)         |
|                                                | DBP [mmHg]                                       | 243                   | 81.5 (7.8)    | 81.2 (7.6)    | -0.4 (8.5)         | 202         | 80.6 (7.3)    | 81.3 (7.8)    | 0.7 (8.3)          | 799        | 82.0 (7.8)    | 81.6 (7.7)    | -0.3 (8.6)         |
| Biomarkers of inflammation and immune response | Neutrophils [%]                                  | 228                   | 52.9 (9.4)    | 53.9 (8.0)    | 1.0 (9.5)          | 187         | 52.1 (8.6)    | 54.1 (7.4)    | 2.0 (8.9)          | 762        | 53.5 (9.1)    | 54.7 (7.8)    | 1.1 (9.4)          |
|                                                | IL-6 [pg/ml]                                     | 236                   | 2.1 (4.5)     | 2.0 (1.9)     | -0.1 (4.2)         | 196         | 1.8 (1.8)     | 1.8 (1.6)     | 0.0 (1.6)          | 785        | 1.8 (2.1)     | 2.0 (2.3)     | 0.2 (1.8)          |
|                                                | IL-8 [pg/ml]                                     | 236                   | 6.1 (3.8)     | 6.2 (3.6)     | 0.2 (3.7)          | 196         | 6.2 (2.9)     | 6.1 (3.2)     | -0.2 (3.0)         | 784        | 6.5 (3.5)     | 6.1 (3.3)     | -0.4 (3.0)         |
|                                                | TNF-α [pg/ml]                                    | 236                   | 6.0 (4.7)     | 5.4 (3.3)     | -0.7 (3.9)         | 196         | 7.3 (18.2)    | 5.6 (2.1)     | -1.8 (18.2)        | 785        | 6.6 (17.9)    | 6.2 (15.3)    | -0.4 (2.9)         |
|                                                | MPO [ng/ml]                                      | 234                   | 266.6 (170.8) | 297.4 (261.9) | 29.3 (184.8)       | 196         | 267.0 (125.4) | 307.4 (147.6) | 38.4 (107.2)       | 785        | 279.4 (167.6) | 300.0 (164.2) | 23.8 (113.7)       |
|                                                | CC16 [ng/ml]                                     | 239                   | 14.7 (19.3)   | 18.0 (29.9)   | 2.1 (20.0)         | 195         | 45.1 (80.1)   | 55.0 (105.7)  | 7.6 (80.9)         | 787        | 42.3 (86.9)   | 38.7 (80.0)   | -3.5 (92.0)        |
|                                                | CRP [mg/ml]                                      | 241                   | 2.6 (3.6)     | 2.5 (3.5)     | -0.1 (1.2)         | 198         | 2.2 (3.2)     | 2.2 (3.3)     | 0.0 (0.8)          | 789        | 2.2 (3.7)     | 2.2 (3.5)     | 0.0 (1.1)          |
|                                                | IgE [IU/ml]                                      | 241                   | 134.7 (319.7) | 131.0 (314.1) | -4.3 (19.2)        | 198         | 101.9 (172.2) | 99.9 (165.4)  | -3.0 (12.0)        | 789        | 163.4 (471.8) | 158.3 (465.2) | -4.2 (25.0)        |
| Respiratory biomarkers                         | FeNO [ppb]                                       |                       |               |               |                    |             |               |               |                    |            |               |               |                    |
|                                                | Non-smoker                                       | 109                   | 17.7 (11.9)   | 16.4 (11.2)   | -1.3 (4.0)         | 99          | 18.9 (10.6)   | 17.8 (10.9)   | -1.6 (4.2)         | 337        | 17.8 (12.0)   | 17.1 (11.7)   | -0.8 (4.7)         |
|                                                | Former smoker                                    | 62                    | 17.1 (14.3)   | 15.2 (10.9)   | -2.0 (7.1)         | 45          | 20.5 (15.7)   | 20.8 (18.2)   | 0.3 (6.1)          | 176        | 17.4 (14.5)   | 16.1 (13.7)   | -1.2 (5.4)         |
|                                                | Current smoker                                   | 70                    | 11.5 (9.3)    | 10.8 (9.5)    | -0.8 (4.7)         | 54          | 13.2 (9.2)    | 11.9 (7.9)    | -1.0 (3.4)         | 274        | 11.9 (10.5)   | 10.9 (10.3)   | -1.1 (6.0)         |
|                                                | FEV <sub>1</sub> %/FVC% [%] (pre and post shift) |                       |               |               |                    |             |               |               |                    |            |               |               |                    |
|                                                | Non-smoker                                       | 106                   | 95.6 (7.5)    | 95.7 (7.1)    | /                  | 96          | 96.2 (7.1)    | 96.5 (7.3)    | /                  | 316        | 95.2 (7.5)    | 95.1 (7.9)    | /                  |
|                                                | Former smoker                                    | 62                    | 96.6 (7.9)    | 96.9 (7.8)    | /                  | 41          | 94.8 (7.4)    | 94.7 (7.4)    | /                  | 161        | 94.0 (6.6)    | 94.6 (7.1)    | /                  |
| Current smoker                                 | 68                                               | 93.3 (8.8)            | 93.3 (7.5)    | /             | 46                 | 92.8 (6.3)  | 93.5 (6.6)    | /             | 239                | 93.7 (7.5) | 93.7 (7.1)    | /             |                    |

\* Data for number (N) are related to post- vs. pre-shift differences (except for FEV<sub>1</sub>%/FVC%). However, number (N) related to pre- and post-shift are comparable to those for post- vs. pre-shift differences.

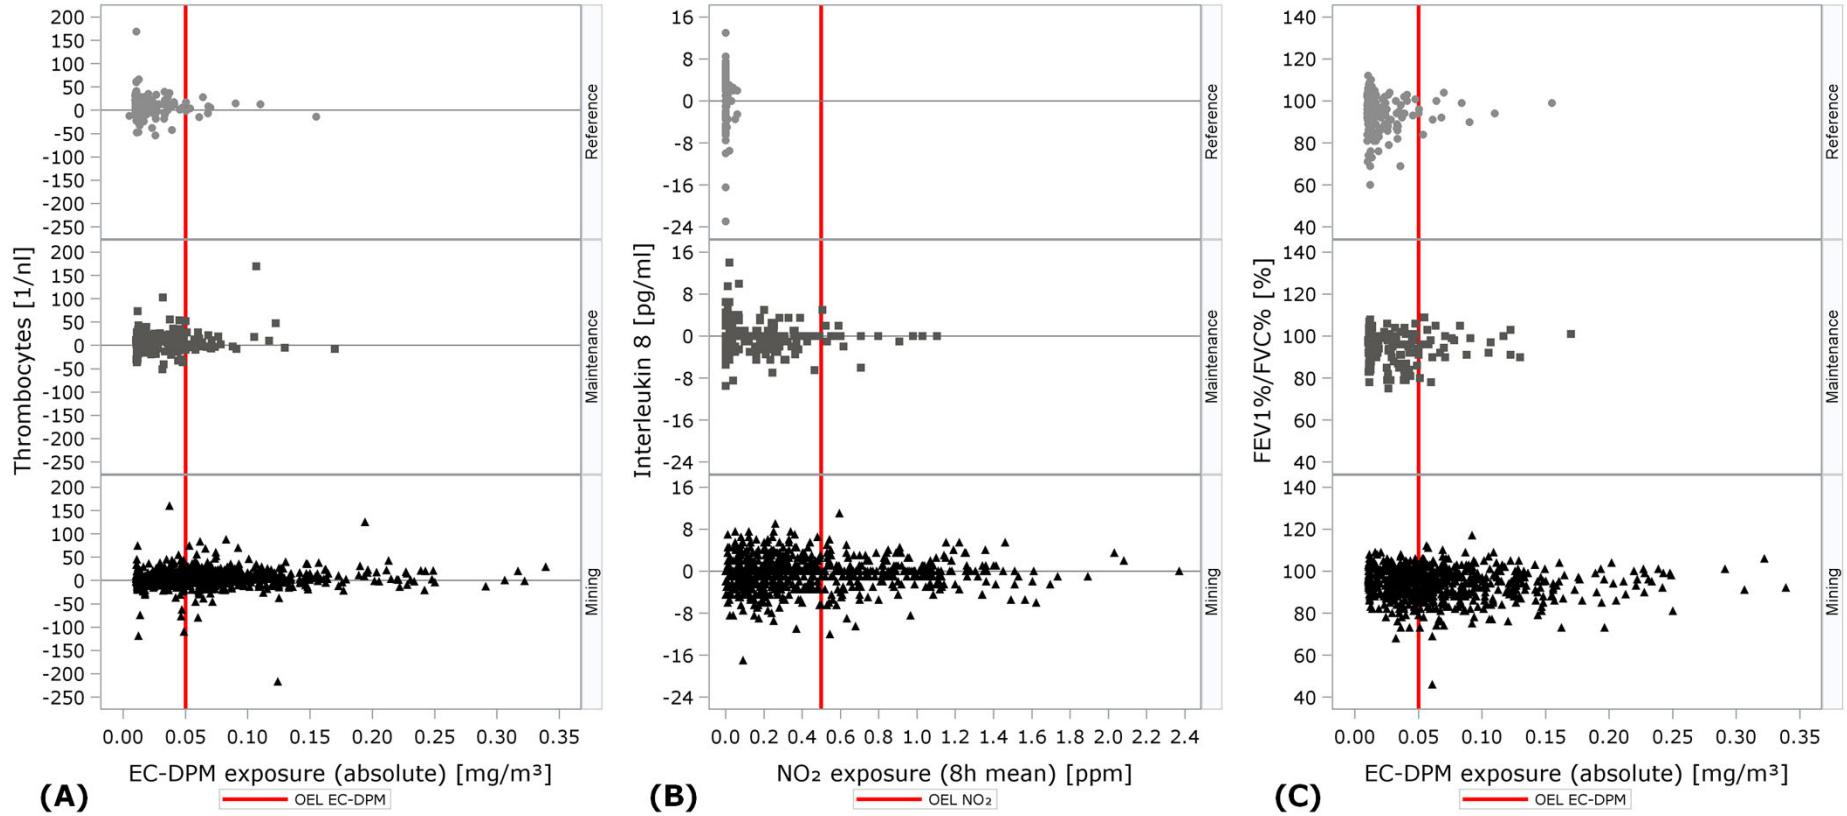

**Fig. S1** Post- vs. pre-shift differences of thrombocyte levels by absolute EC-DPM exposure (A), of Interleukin 8 levels by 8-hour mean exposure of NO<sub>2</sub> (B) and pre-shift values of FEV<sub>1</sub>%/FVC% by absolute EC-DPM exposure (C) for miners, maintenance workers, and reference group workers
